# Supplementary material for: Evolutionary persistence in Gunnera and the contribution of southern plant groups to the tropical Andes biodiversity hotspot
Source: PeerJ journal article supplement (doi:10.7717/peerj.4388), 2018-03-16

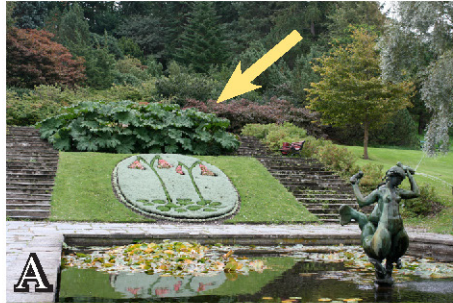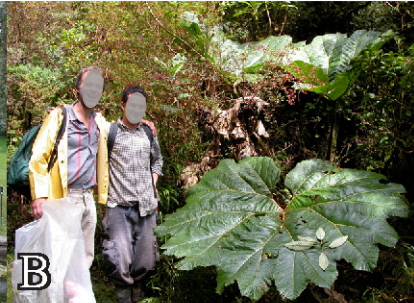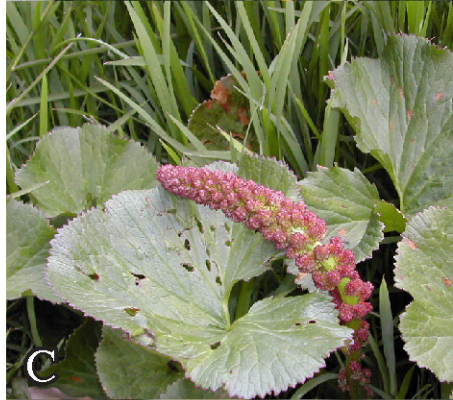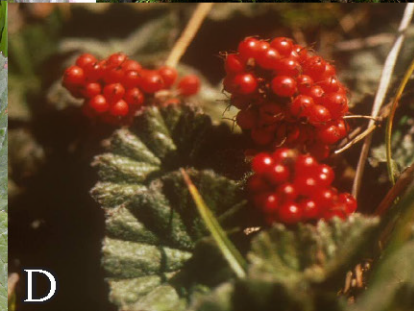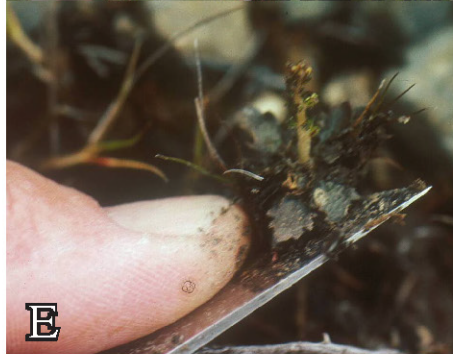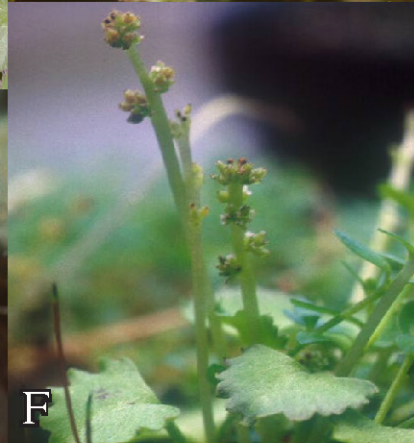

Supplement: Fig_S1_Morphology.pdf [file Fig_S1_Morphology.pdf]
