# Supplementary material for: Evolutionary persistence in Gunnera and the contribution of southern plant groups to the tropical Andes biodiversity hotspot
Source: PeerJ journal article supplement (doi:10.7717/peerj.4388), 2018-03-16
Supplement: Table_S2.pdf [file Table_S2.pdf]

Table S2. Matrices of dispersal and areas allowed used in BioGeoBEARS for each slide of time (0-30, 30-40 and 40-90 Mya). In the areas allowed matrix a value of zero represents an area that is removed, and a value of 1 an area that is present. In the dispersal matrix, values represent percentages of connectivity between areas. (0= 0% and 1=100%). Note that probabilities for each geographic range are calculated only for the allowed areas given in the areas allowed matrix (with a value of 1). Ranges are coded as follows: **A** - Northern Andes, **B** - Central Andes, **C** - Southern Andes, **D** - Southern south America, **E** - Central America, **F** - Hawaii, **G** - Africa, **H** - Malay Archipelago and **I** - Tasmania and New Zealand.

**0 – 30 Mya**

| <u>Areas allowed matrix</u> |          |          |          |          |          |          |          |          |          | <u>Dispersal matrix</u> |          |          |          |          |          |          |          |          |          |
|-----------------------------|----------|----------|----------|----------|----------|----------|----------|----------|----------|-------------------------|----------|----------|----------|----------|----------|----------|----------|----------|----------|
|                             | <b>A</b> | <b>B</b> | <b>C</b> | <b>D</b> | <b>E</b> | <b>F</b> | <b>G</b> | <b>H</b> | <b>I</b> |                         | <b>A</b> | <b>B</b> | <b>C</b> | <b>D</b> | <b>E</b> | <b>F</b> | <b>G</b> | <b>H</b> | <b>I</b> |
| <b>A</b>                    | 1        | 1        | 1        | 1        | 1        | 1        | 1        | 1        | 1        | <b>A</b>                | 1        | 1        | 1        | 1        | 1        | 1        | 0.001    | 1        | 0.001    |
| <b>B</b>                    | 1        | 1        | 1        | 1        | 1        | 1        | 1        | 1        | 1        | <b>B</b>                | 1        | 1        | 1        | 1        | 1        | 1        | 0.001    | 1        | 0.001    |
| <b>C</b>                    | 1        | 1        | 1        | 1        | 1        | 1        | 1        | 1        | 1        | <b>C</b>                | 1        | 1        | 1        | 1        | 1        | 1        | 0.001    | 1        | 0.001    |
| <b>D</b>                    | 1        | 1        | 1        | 1        | 1        | 1        | 1        | 1        | 1        | <b>D</b>                | 1        | 1        | 1        | 1        | 1        | 1        | 0.001    | 1        | 0.001    |
| <b>E</b>                    | 1        | 1        | 1        | 1        | 1        | 1        | 1        | 1        | 1        | <b>E</b>                | 1        | 1        | 1        | 1        | 1        | 1        | 1        | 1        | 1        |
| <b>F</b>                    | 1        | 1        | 1        | 1        | 1        | 1        | 1        | 1        | 1        | <b>F</b>                | 1        | 1        | 1        | 1        | 1        | 1        | 1        | 1        | 1        |
| <b>G</b>                    | 1        | 1        | 1        | 1        | 1        | 1        | 1        | 1        | 1        | <b>G</b>                | 0.001    | 0.001    | 0.001    | 0.001    | 0.001    | 1        | 1        | 1        | 1        |
| <b>H</b>                    | 1        | 1        | 1        | 1        | 1        | 1        | 1        | 1        | 1        | <b>H</b>                | 1        | 1        | 1        | 1        | 1        | 1        | 1        | 1        | 1        |
| <b>I</b>                    | 1        | 1        | 1        | 1        | 1        | 1        | 1        | 1        | 1        | <b>I</b>                | 0.001    | 0.001    | 0.001    | 0.001    | 0.001    | 1        | 1        | 1        | 1        |
